# Supplementary material for: Formation of entangled Co(ii) coordination polymers based on bis-pyridyl-bis-amide and angular dicarboxylate ligands: a structural comparison
Source: Royal Society of Chemistry journal article supplement (doi:10.1039/d3ce00803g), 2023-01-01

**Figure S1.** PXRD pattern of (a) simulated and (b) as-synthesized for complex **1a**.

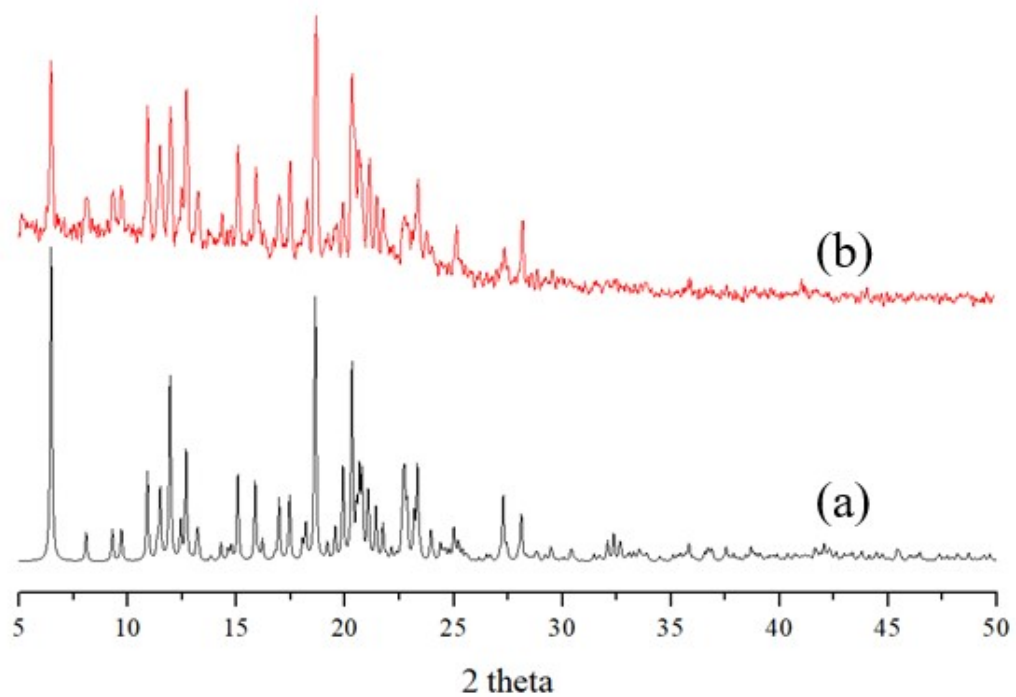

**Figure S2.** PXRD pattern of (a) simulated and (b) as-synthesized for complexes **2a** (top) and **2b** (bottom).

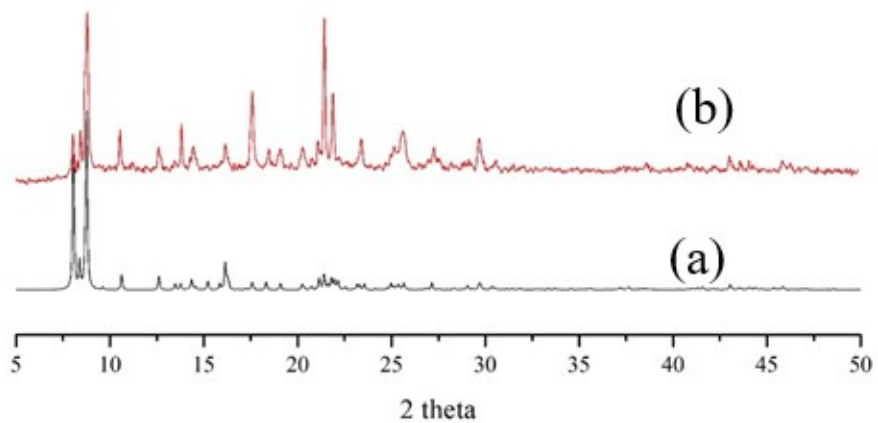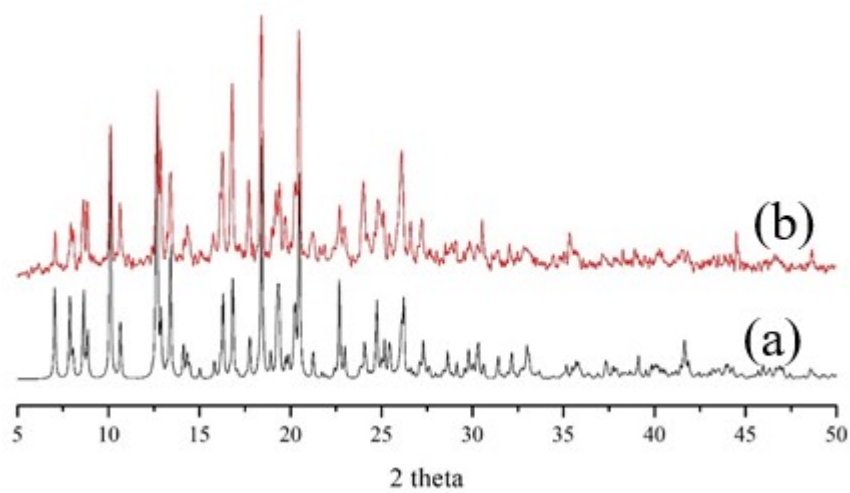

**Figure S3.** PXRD pattern of (a) simulated and (b) as-synthesized for complex **3**.

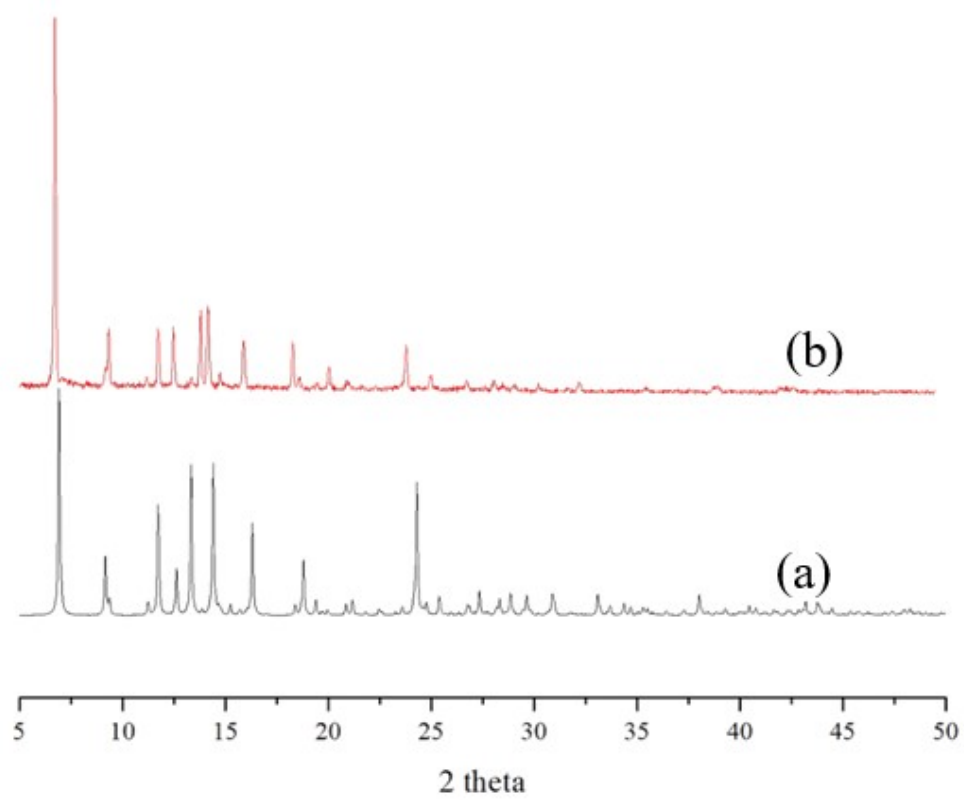

**Figure S4.** PXRD pattern of (a) simulated and (b) as-synthesized for complex 4.

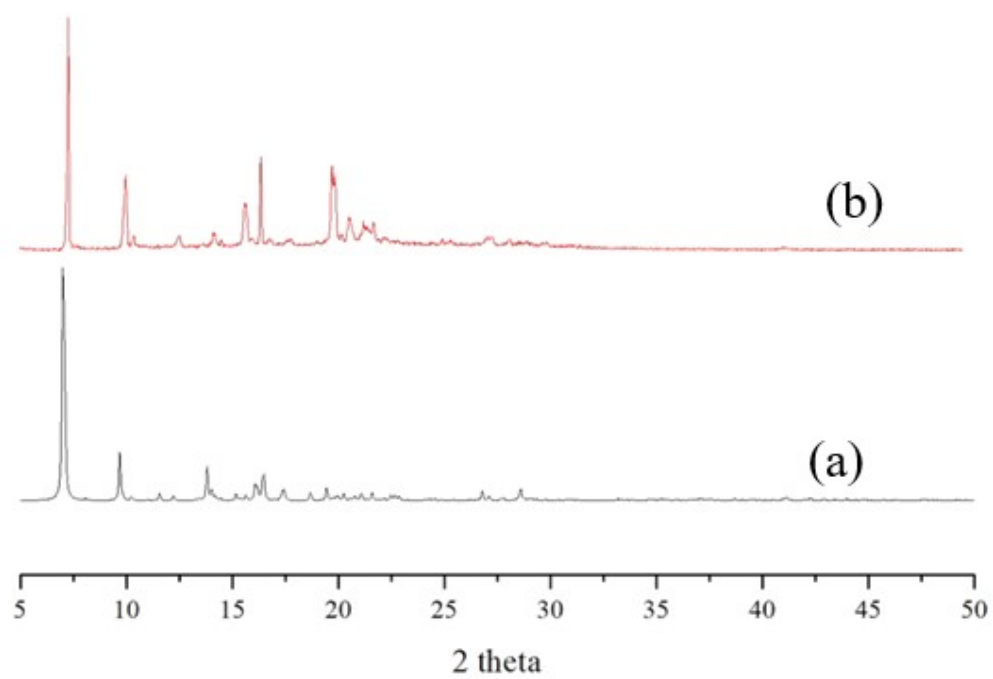

**Figure S5.** PXRD pattern of (a) simulated and (b) as-synthesized for complex **5**.

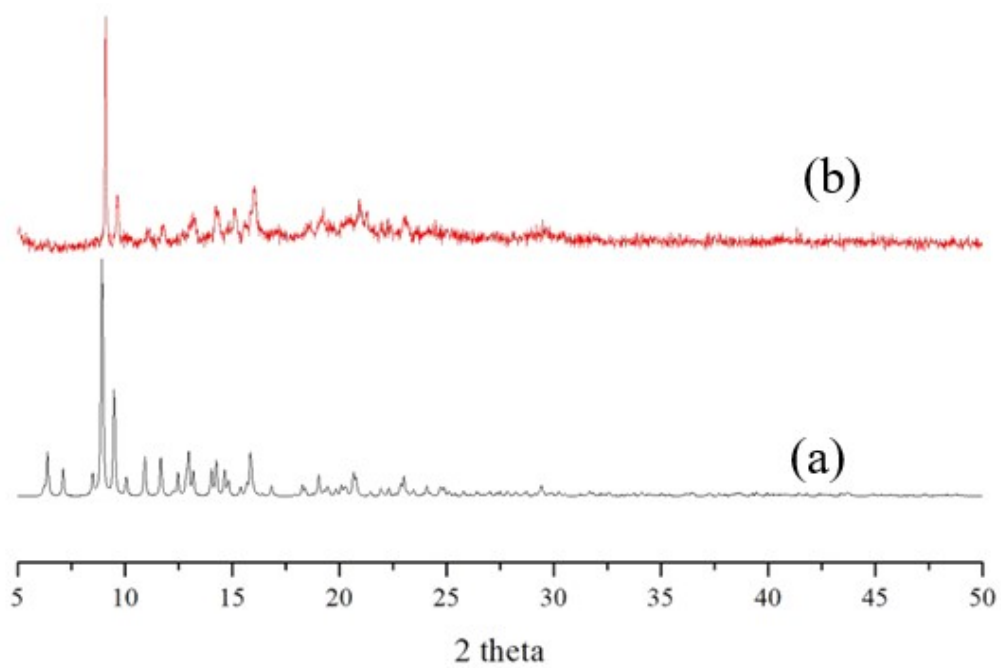

**Figure S6.** PXRD pattern of (a) simulated and (b) as-synthesized for complex **6**.

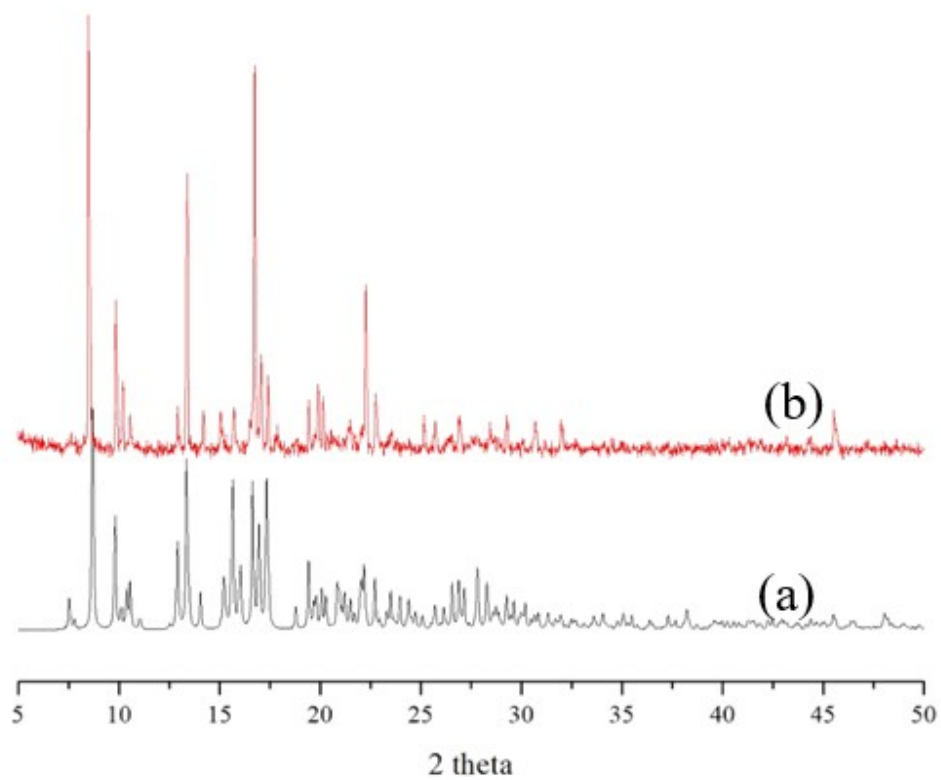

**Figure S7.** PXRD pattern of (a) simulated and (b) as-synthesized for complex 7.

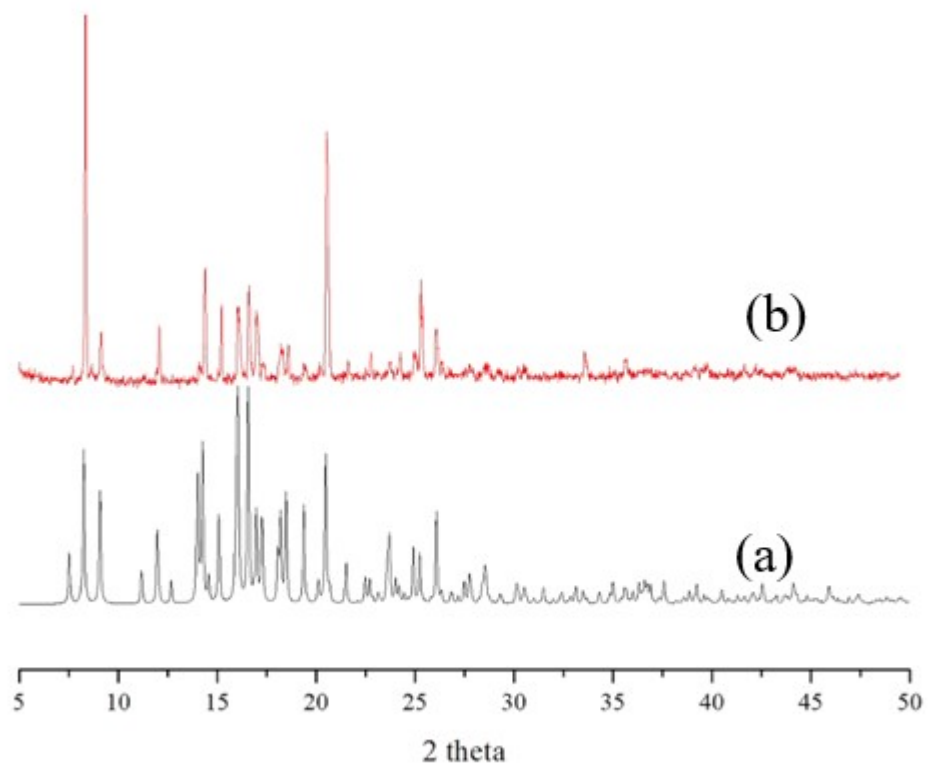

**Figure S8.** PXRD pattern of (a) simulated and (b) as-synthesized for complex **8**.

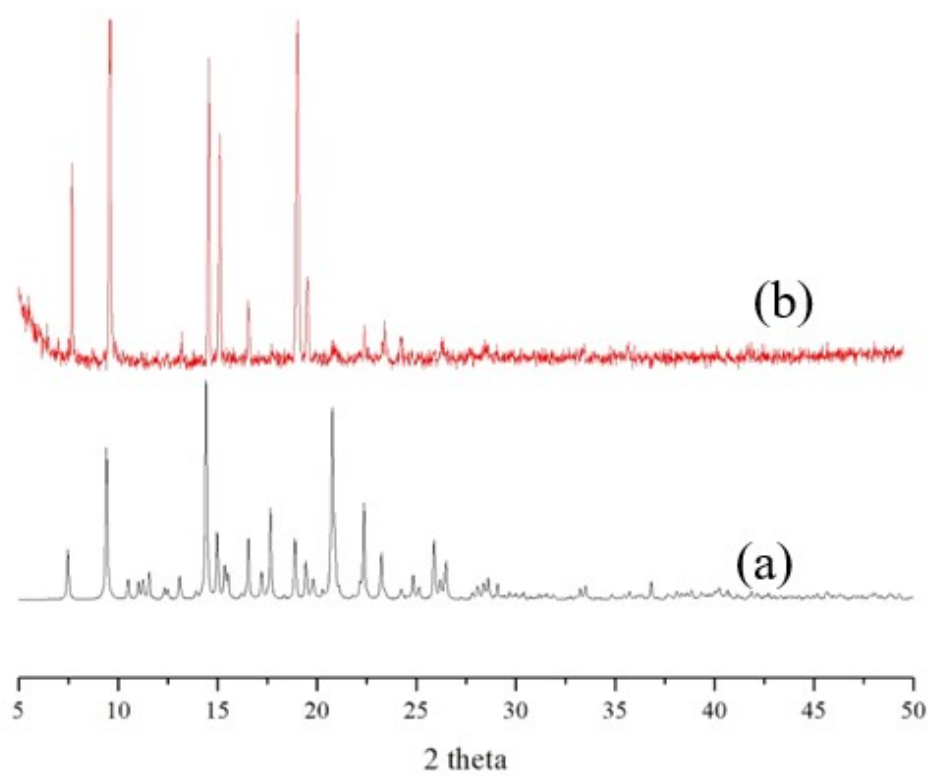

Supplement: d3ce00803g1.pdf [file d3ce00803g1.pdf]
